# Supplementary material for: Bacteroidales-Specific Antimicrobial Genes Can Influence the Selection of the Dominant Fecal Strain of Bacteroides vulgatus and Bacteroides uniformis from the Gastrointestinal Tract Microbial Community
Source: MDPI journal article supplement (doi:10.3390/life14050555), 2024-04-26
Supplement: s1 [file s1]

**Supplementary Table S1. Gene analysis summary table for the HMP data set.**

Gene analysis which includes WSS and BLAST was conducted for the HMP data set. “+” indicates complete BSAP sequence was observed; “-” indicates no BSAP sequence was observed; “-” with yellow box indicates partial BSAP sequence was observed. Empty white box indicates not applicable due to a no WSS score or WSS score below the cut-off value.

|         |         |   | WSS score<br>( <i>B. vulgatus</i> ) | WSS score<br>( <i>B. uniformis</i> ) | <i>B. vulgatus</i> | <i>B. uniformis</i> |
|---------|---------|---|-------------------------------------|--------------------------------------|--------------------|---------------------|
| Dataset | Samples |   | Cutoff: 95.1                        | Cutoff: 97.8                         | BSAP-3             | BSAP-2              |
| HMP     | S10     | a | 100                                 | 100                                  | +                  | -                   |
|         |         | b |                                     |                                      | +                  | -                   |
|         | S14     | a | 100                                 | 100                                  | -                  | -                   |
|         |         | b |                                     |                                      | -                  | -                   |
|         | S15     | a | 100                                 | 99                                   | +                  | +                   |
|         |         | b |                                     |                                      | +                  | +                   |
|         | S16     | a | 100                                 | 100                                  | -                  | -                   |
|         |         | b |                                     |                                      | -                  | -                   |
|         | S17     | a | 100                                 | 100                                  | -                  | -                   |
|         |         | b |                                     |                                      | -                  | -                   |
|         | S18     | a | 100                                 | 100                                  | -                  | +                   |
|         |         | b |                                     |                                      | -                  | +                   |
|         | S19     | a | 99                                  | 100                                  | +                  | -                   |
|         |         | b |                                     |                                      | +                  | -                   |
|         | S20     | a | 100                                 | 100                                  | +                  | -                   |
|         |         | b |                                     |                                      | +                  | -                   |
|         | S21     | a | 99                                  | 100                                  | -                  | -                   |
|         |         | b |                                     |                                      | -                  | -                   |
|         | S23     | a | 98                                  | 100                                  | -                  | -                   |
|         |         | b |                                     |                                      | -                  | -                   |
|         | S24     | a | 100                                 | 100                                  | +                  | -                   |
|         |         | b |                                     |                                      | +                  | -                   |
|         | S28     | a | 99                                  | 100                                  | -                  | -                   |
|         |         | b |                                     |                                      | -                  | -                   |
|         | S29     | a | 100                                 | 100                                  | +                  | -                   |
|         |         | b |                                     |                                      | +                  | -                   |
|         | S31     | a | 100                                 | 99                                   | -                  | -                   |
|         |         | b |                                     |                                      | -                  | -                   |
|         | S48     | a | 100                                 | 100                                  | -                  | -                   |
|         |         | b |                                     |                                      | -                  | -                   |
|         | S49     | a | 100                                 | 100                                  | -                  | -                   |
|         |         | b |                                     |                                      | -                  | -                   |

|  |     |   |     |     |   |    |
|--|-----|---|-----|-----|---|----|
|  | S51 | a | 100 | 100 | + | -  |
|  |     | b |     |     | + | -  |
|  | S55 | a | 100 | 100 | + | +  |
|  |     | b |     |     | + | +  |
|  | S57 | a | 100 | 100 | + | -  |
|  |     | b |     |     | + | -  |
|  | S5  | a | 99  | 100 | - | -  |
|  |     | b |     |     | - | -  |
|  | S60 | a | 100 | 100 | - | -  |
|  |     | b |     |     | - | -  |
|  | S61 | a | 100 | 100 | + | -  |
|  |     | b |     |     | + | -  |
|  | S62 | a | 100 | 100 | - | +  |
|  |     | b |     |     | - | +  |
|  | S63 | a | 99  | 100 | - | +  |
|  |     | b |     |     | - | +  |
|  | S64 | a | 100 | 97  | - | NS |
|  |     | b |     |     | - | NS |
|  | S65 | a | 100 | 100 | - | -  |
|  |     | b |     |     | - | -  |
|  | S66 | a | 100 | 100 | - | -  |
|  |     | b |     |     | - | -  |
|  | S68 | a | 100 | 100 | + | +  |
|  |     | b |     |     | + | +  |
|  | S69 | a | 100 | 100 | - | +  |
|  |     | b |     |     | - | +  |
|  | S70 | a | 100 | 97  | - | NS |
|  |     | b |     |     | - | NS |

**Supplementary Table S2. Gene analysis summary table for the Raymond et al. [18].**

Gene analysis which includes WSS and BLAST was conducted for the Raymond et al. “+” indicates complete BSAP sequence was observed; “-” indicates no BSAP sequence was observed; “-” with yellow box indicates partial BSAP sequence was observed; “NS” indicates No WSS score observed. Empty white box indicates not applicable due to a no WSS score or WSS score blow the cut-off value.

|                                                         |         |      | WSS score<br>( <i>B. vulgatus</i> ) | WSS score<br>( <i>B. uniformis</i> ) | <i>B. vulgatus</i> | <i>B. uniformis</i> |
|---------------------------------------------------------|---------|------|-------------------------------------|--------------------------------------|--------------------|---------------------|
| Dataset                                                 | Samples | Days | Cutoff: 95.1                        | Cutoff: 97.8                         | BSAP-3             | BSAP-2              |
| Raymond<br>et al.<br>Antibiotics<br>treated<br>samples. | P1      | 0    | 94                                  | 89                                   | -                  | +                   |
|                                                         |         | 7    | 96                                  | 91                                   | -                  | +                   |
|                                                         |         | 90   |                                     |                                      | -                  | +                   |
|                                                         | P2      | 0    | 99                                  | 99                                   | -                  | -                   |
|                                                         |         | 7    | 53                                  | 53                                   | -                  | -                   |
|                                                         |         | 90   |                                     |                                      | -                  | -                   |
|                                                         | P3      | 0    | 100                                 | 100                                  | -                  | +                   |
|                                                         |         | 7    | 34                                  | 96                                   | -                  | +                   |
|                                                         |         | 90   |                                     |                                      | -                  | +                   |
|                                                         | P4      | 0    | 97                                  | 52                                   | -                  | -                   |
|                                                         |         | 7    | 99                                  | 99                                   | -                  | -                   |
|                                                         |         | 90   |                                     |                                      | +                  | -                   |
|                                                         | P5      | 0    | 100                                 | NS                                   | +                  | NS                  |
|                                                         |         | 7    | 100                                 | NS                                   | +                  | NS                  |
|                                                         |         | 90   |                                     |                                      | +                  | NS                  |
|                                                         | P9      | 0    | 100                                 | 100                                  | -                  | -                   |
|                                                         |         | 7    | 100                                 | 100                                  | -                  | -                   |
|                                                         |         | 90   |                                     |                                      | -                  | -                   |
|                                                         | P10     | 0    | 99                                  | 100                                  | +                  | -                   |
|                                                         |         | 7    | 99                                  | 98                                   | +                  | -                   |
|                                                         |         | 90   |                                     |                                      | +                  | -                   |
|                                                         | P11     | 0    | 100                                 | 100                                  | -                  | -                   |
|                                                         |         | 7    | 89                                  | 36                                   | -                  | -                   |
|                                                         |         | 90   |                                     |                                      | -                  | -                   |
|                                                         | P13     | 0    | 96                                  | 100                                  | -                  | -                   |
|                                                         |         | 7    | 98                                  | 99                                   | -                  | -                   |
|                                                         |         | 90   |                                     |                                      | -                  | -                   |
|                                                         | P14     | 0    | 100                                 | 99                                   | -                  | +                   |
|                                                         |         | 7    | 99                                  | 100                                  | +                  | +                   |
|                                                         |         | 90   |                                     |                                      | +                  | +                   |
|                                                         | P15     | 0    | 100                                 | 100                                  | -                  | -                   |
|                                                         |         | 7    | 99                                  | 100                                  | -                  | -                   |
|                                                         |         | 90   |                                     |                                      | +                  | -                   |
|                                                         | P17     | 0    | 100                                 | 100                                  | +                  | -                   |
|                                                         |         | 7    | 95                                  | 95                                   | -                  | -                   |
|                                                         |         | 90   |                                     |                                      | +                  | -                   |
|                                                         | P18     | 0    | 100                                 | 100                                  | -                  | -                   |
|                                                         |         | 7    | 84                                  | 100                                  | -                  | -                   |

|                                         |     |    |     |     |    |    |
|-----------------------------------------|-----|----|-----|-----|----|----|
|                                         |     | 90 |     |     | -  | -  |
|                                         |     | 0  | 100 | 81  | -  | -  |
|                                         |     | 7  | 100 | 79  | -  | -  |
|                                         | P19 | 90 |     |     | -  | -  |
|                                         |     | 0  | 100 | 98  | -  | -  |
|                                         |     | 7  | 99  | 100 | -  | -  |
|                                         | P20 | 90 |     |     | -  | -  |
|                                         |     | 0  | 100 | 100 | -  | -  |
|                                         |     | 7  | 100 | 97  | -  | -  |
|                                         | P21 | 90 |     |     | -  | -  |
|                                         |     | 0  | NS  | 100 | NS | +  |
|                                         |     | 7  | NS  | NS  | NS | NS |
|                                         | P22 | 90 |     |     | NS | +  |
| Raymond<br>et al.<br>Control<br>samples | P23 | 0  | 100 | 100 | +  | +  |
|                                         |     | 7  | 100 | 100 | +  | +  |
|                                         |     | 90 |     |     | +  | +  |
|                                         | P25 | 0  | 99  | 100 | +  | -  |
|                                         |     | 7  | 99  | 100 | +  | -  |
|                                         |     | 90 |     |     | +  | -  |
|                                         | P38 | 0  | 100 | 100 | +  | -  |
|                                         |     | 7  | 100 | 100 | +  | -  |
|                                         |     | 90 |     |     | +  | -  |
|                                         | P6  | 0  | 100 | 100 | -  | -  |
|                                         |     | 7  | 100 | 100 | -  | -  |
|                                         |     | 90 |     |     | -  | -  |
|                                         | P7  | 0  | 100 | 100 | -  | -  |
|                                         |     | 7  | 100 | 100 | -  | -  |
|                                         |     | 90 |     |     | +  | -  |
|                                         | P8  | 0  | 100 | 100 | -  | +  |
|                                         |     | 7  | 100 | 100 | -  | +  |
|                                         |     | 90 |     |     | -  | +  |

**Supplementary Table S3. Gene analysis summary table for the Palleja et al. [19].**  
Gene analysis which includes WSS and BLAST was conducted for the Palleja et al. “+” indicates complete BSAP sequence was observed; “-” indicates no BSAP sequence was observed; “-” with yellow box indicates partial BSAP sequence was observed; “NS” indicates No WSS score observed. Empty white box indicates not applicable due to a no WSS score or WSS score blow the cut-off value.

|                   |         |      | WSS score<br>( <i>B. vulgatus</i> ) | WSS score<br>( <i>B. uniformis</i> ) | <i>B. vulgatus</i> | <i>B. uniformis</i> |
|-------------------|---------|------|-------------------------------------|--------------------------------------|--------------------|---------------------|
| Dataset           | Samples | Days | Cutoff: 95.1                        | Cutoff: 97.8                         | BSAP-3             | BSAP-2              |
| Palleja<br>et al. | P1      | 0    | 100                                 | NS                                   | +                  | NS                  |
|                   |         | 8    | 89                                  | NS                                   | -                  | NS                  |
|                   |         | 42   | 100                                 | NS                                   | +                  | NS                  |
|                   |         | 180  |                                     |                                      | +                  | NS                  |
|                   | P3      | 0    | 2                                   | 99                                   | -                  | -                   |
|                   |         | 8    | 100                                 | 20                                   | -                  | -                   |
|                   |         | 42   | 100                                 | 93                                   | -                  | -                   |
|                   |         | 180  |                                     |                                      | -                  | -                   |
|                   | P4      | 0    | 35                                  | 97                                   | -                  | +                   |
|                   |         | 8    | NS                                  | NS                                   | NS                 | NS                  |
|                   |         | 42   | 100                                 | 100                                  | +                  | +                   |
|                   |         | 180  |                                     |                                      | +                  | +                   |
|                   | P5      | 0    | 73                                  | 14                                   | -                  | -                   |
|                   |         | 8    | NS                                  | NS                                   | NS                 | NS                  |
|                   |         | 42   | 100                                 | 100                                  | -                  | -                   |
|                   |         | 180  |                                     |                                      | -                  | -                   |
|                   | P6      | 0    | 90                                  | NS                                   | -                  | NS                  |
|                   |         | 8    | 2                                   | NS                                   | -                  | NS                  |
|                   |         | 42   | 96                                  | 22                                   | -                  | -                   |
|                   |         | 180  |                                     |                                      | -                  | -                   |
|                   | P8      | 0    | 100                                 | 13                                   | -                  | -                   |
|                   |         | 8    | 19                                  | NS                                   | -                  | NS                  |
|                   |         | 42   | 100                                 | 19                                   | -                  | -                   |
|                   |         | 180  |                                     |                                      | -                  | -                   |
|                   | P9      | 0    | 24                                  | 100                                  | -                  | -                   |
|                   |         | 8    | NS                                  | NS                                   | NS                 | NS                  |
|                   |         | 42   | 100                                 | 100                                  | -                  | -                   |
|                   |         | 180  |                                     |                                      | -                  | -                   |
|                   | P10     | 0    | NS                                  | 97                                   | NS                 | +                   |
|                   |         | 8    | NS                                  | NS                                   | NS                 | NS                  |
|                   |         | 42   | NS                                  | 100                                  | NS                 | +                   |
|                   |         | 180  |                                     |                                      | NS                 | +                   |

|  |     |     |     |     |    |    |
|--|-----|-----|-----|-----|----|----|
|  | P11 | 0   | 99  | 100 | -  | -  |
|  |     | 8   | NS  | NS  | NS | NS |
|  |     | 42  | 21  | 100 | -  | +  |
|  |     | 180 |     |     | -  | +  |
|  | P12 | 0   | 100 | 13  | -  | -  |
|  |     | 8   | 83  | 10  | -  | -  |
|  |     | 42  | 100 | 100 | -  | -  |
|  |     | 180 |     |     | -  | -  |
