# Supplementary material for: Bacteroidales-Specific Antimicrobial Genes Can Influence the Selection of the Dominant Fecal Strain of Bacteroides vulgatus and Bacteroides uniformis from the Gastrointestinal Tract Microbial Community
Source: MDPI journal article supplement (doi:10.3390/life14050555), 2024-04-26
Supplement: s1 [file s1]

Title: *Bacteroidales*-specific antimicrobial genes can influence the selection of the dominant fecal strain of *Bacteroides vulgatus* and *Bacteroides uniformis* from the gastrointestinal tract microbial community

Authors: Hyunmin Koo, Casey D. Morrow

## Supplementary Material

For the WSS analysis, sequence reads from each sample were aligned to the 93 microbial reference genomes which were previously established based on the HMP dataset<sup>1,2</sup> using the Burrows-Wheeler aligner (BWA) tool<sup>3</sup>. Each sample was analyzed for multi-sample SNVs relative to the provided reference genome using the Genome Analysis Toolkit (GATK)<sup>4</sup>. The resulting multi-sample Variant Call Format (VCF) files were utilized for pairwise comparisons between all possible pairs of samples. This was done to determine the overall genome-wide SNV similarity for each microbial species. Samples with sequence coverage below 30% and sequence depth less than 3.5 against their given reference genome were excluded from the pairwise comparisons<sup>1,5-8</sup>. After quality-based filtering processes, *B. vulgatus* species that was able to provide the WSS score was selected from each data set. In order to identify related strains, the WSS score for the *B. vulgatus* species was compared to a previously established cut-off value from our earlier study. (For related strain pairs: WSS score > cut-off; for unrelated strain pairs: WSS score < cut-off)<sup>1,9</sup>.

## References

1. Kumar, R. et al. Identification of donor microbe species that colonize and persist long term in the recipient after fecal transplant for recurrent *Clostridium difficile*. NPJ biofilms and microbiomes 3, 1-4, doi:10.1038/s41522-017-0020-7 (2017).
2. Schloissnig, S. et al. Genomic variation landscape of the human gut microbiome. Nature 493, 45-50, doi:10.1038/nature11711 (2013).
3. Li, H. & Durbin, R. Fast and accurate long-read alignment with Burrows–Wheeler transform. Bioinformatics 26, 589-595, doi:10.1093/bioinformatics/btp698 (2010).
4. Van der Auwera, G. A. et al. From FastQ data to high confidence variant calls: the Genome Analysis Toolkit best practices pipeline. Curr Protoc Bioinformatics 43, 11.10.11-33, doi:10.1002/0471250953.bi1110s43 (2013).
5. Koo, H., Crossman, D. K. & Morrow, C. D. Strain Tracking to Identify Individualized Patterns of Microbial Strain Stability in the Developing Infant Gut Ecosystem. Frontiers in Pediatrics 8 (2020).
6. Koo, H. et al. Individualized recovery of gut microbial strains post antibiotics. NPJ Biofilms Microbiomes 5, 30, doi:10.1038/s41522-019-0103-8 (2019).
7. Koo, H., Hakim, J. A., Crossman, D. K., Lefkowitz, E. J. & Morrow, C. D. Sharing of gut microbial strains between selected individual sets of twins cohabitating for decades. PLOS One 14, e0226111, doi:10.1371/journal.pone.0226111 (2019).
8. Koo, H. & Morrow, C. D. Perturbation of the human gastrointestinal tract microbial ecosystem by oral drugs to treat chronic disease results in a spectrum of individual specific patterns of extinction and persistence of dominant microbial strains. PLOS One 15, e0242021, doi:10.1371/journal.pone.0242021 (2020).
9. Kumar, R. et al. New microbe genomic variants in patients fecal community following surgical disruption of the upper human gastrointestinal tract. Human Microbiome Journal 10, 37-42, doi:10.1016/j.humic.2018.10.002 (2018).
